# Supplementary material for: Effectively enhancing topical delivery of agrochemicals onto plant leaves with nanocelluloses
Source: Royal Society of Chemistry journal article supplement (doi:10.1039/d3gc02995f), 2023-01-01
Supplement: d3gc02995f1.pdf [file d3gc02995f1.pdf]

## Supporting Information

# Effectively Enhancing Topical Delivery of Agrochemicals onto Plant Leaves with Nanocelluloses

Shangxu Jiang,<sup>a</sup> Peng Li,<sup>a,\*</sup> Li, Li,<sup>a</sup> Nasim Amiralian,<sup>a</sup> Divya Rajah <sup>a</sup>, Zhi Ping Xu<sup>\*,a,b</sup>

<sup>a</sup> Australian Institute for Bioengineering and Nanotechnology (AIBN), The University of Queensland, St Lucia, QLD 4072, Australia.

<sup>b</sup> Institute of Biomedical Health Technology and Engineering and Institute of Systems and Physical Biology, Shenzhen Bay Laboratory, Shenzhen, 518107, China.

\* Corresponding authors. Tel: 61-7-334 63809 (ZX); Fax: 61-7-33463973.

Email: gordonxu@uq.edu.au (Z. P. Xu); p.li3@uq.edu.au (P. Li)

This supporting information contains:

1. Figure S1-S11;
2. Table S1-S3.

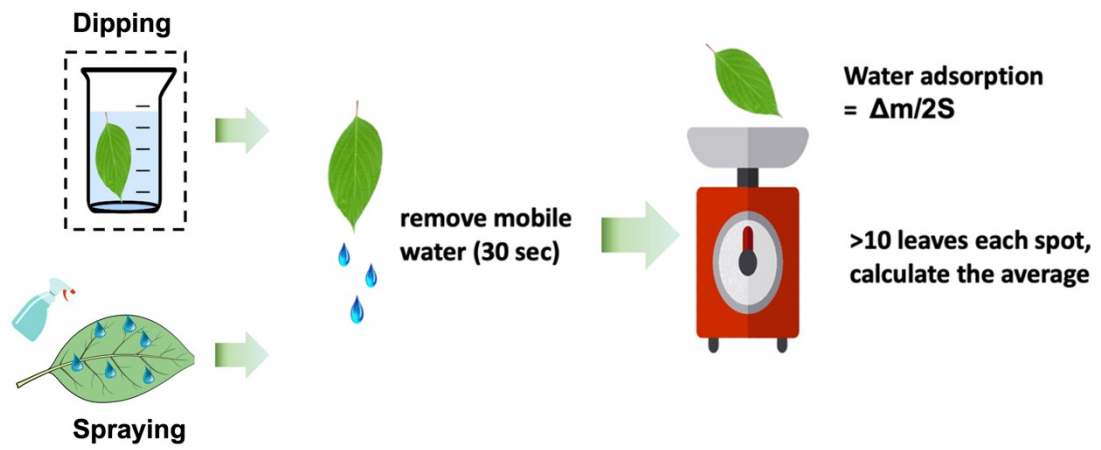

**Figure S1.** The process of liquid holding capacity (LHC) test.

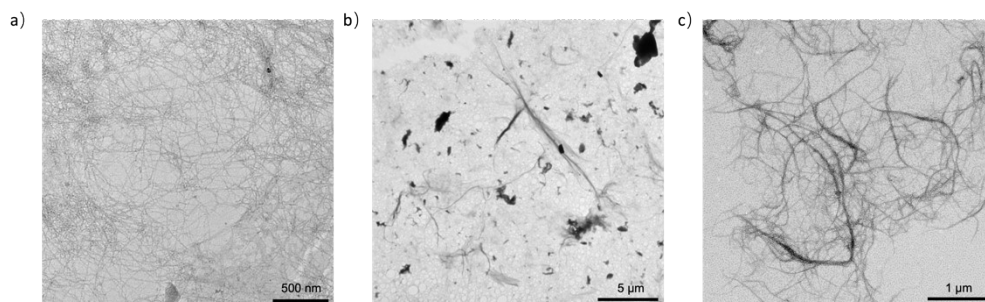

**Figure S2.** TEM image of (a) dried CNF<sup>+</sup> nanocellulose; (b) dried CMF<sup>+</sup> cellulose; (c) dried MCNF nanocellulose .

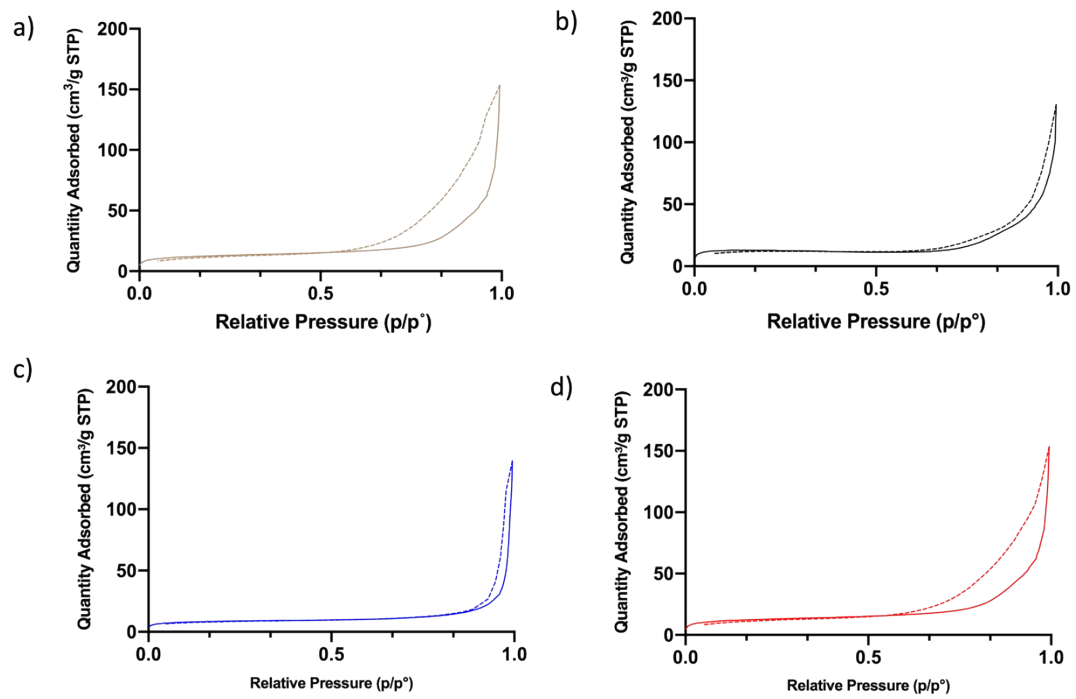

**Figure S3.** BET isotherm patterns of nanocellulose matrix (a)dried MCNF; (b) dried CMF<sup>+</sup>; (c) dried CNC<sup>-</sup>; (d) dried CNF<sup>+</sup>.

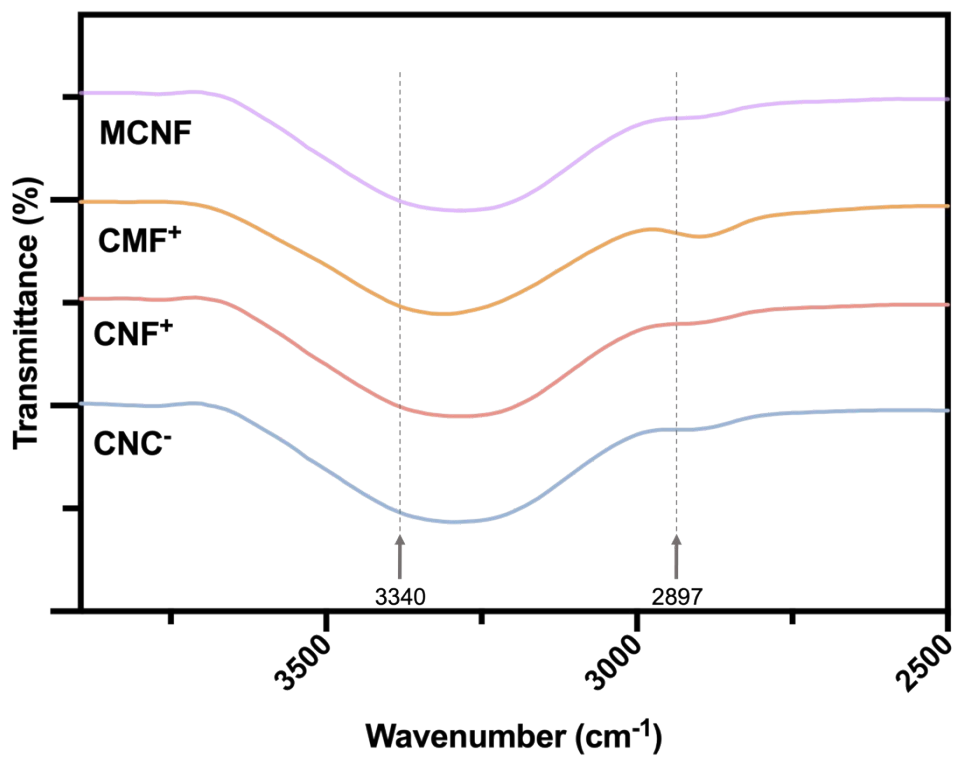

Figure S4. FTIR spectra of MCNF, CNF<sup>+</sup>, CMF<sup>+</sup>, and CNC<sup>-</sup> (2500 – 4000 cm<sup>-1</sup>).

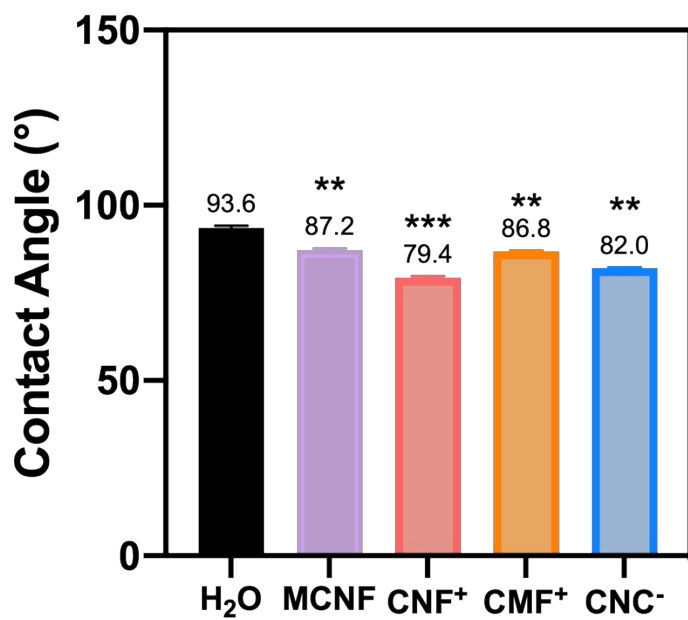

**Figure S5.** Variation of Contact angles of 100 mg/L cellulose suspensions on artificial leaves (PDMS with PVP)

### Water retention of cotton leaves

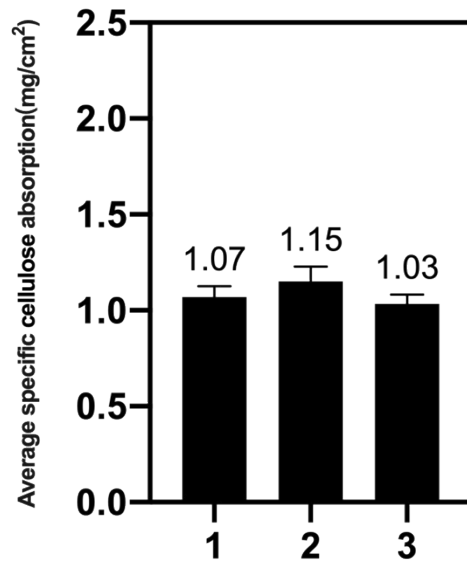

Figure S6. Water retention performance using Milli-Q water on 6-week cotton leaves.

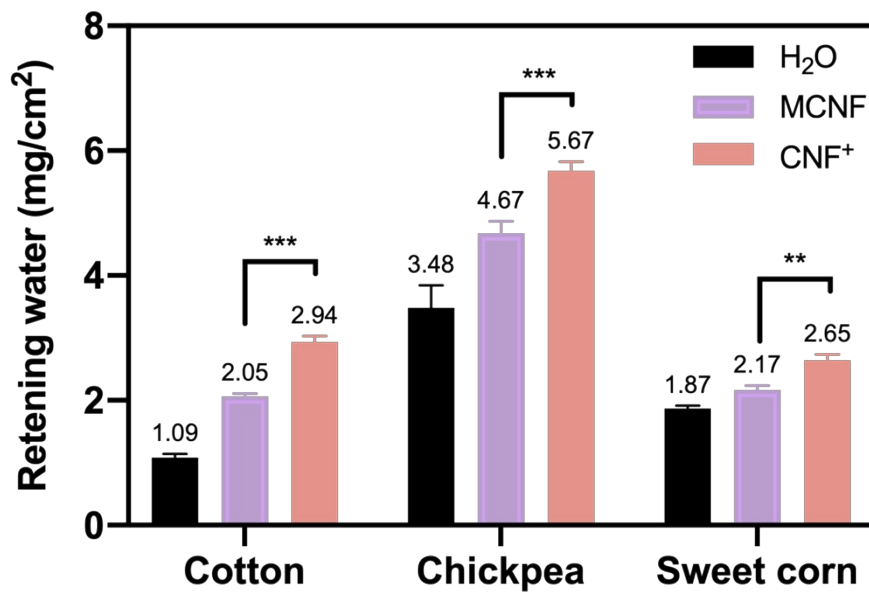

**Figure S7.** Water retention of cellulose suspensions at the cellulose concentration of 100 mg/L on 6-week cotton, 4~6-week chickpea and 4~5-week sweet corn leaves.

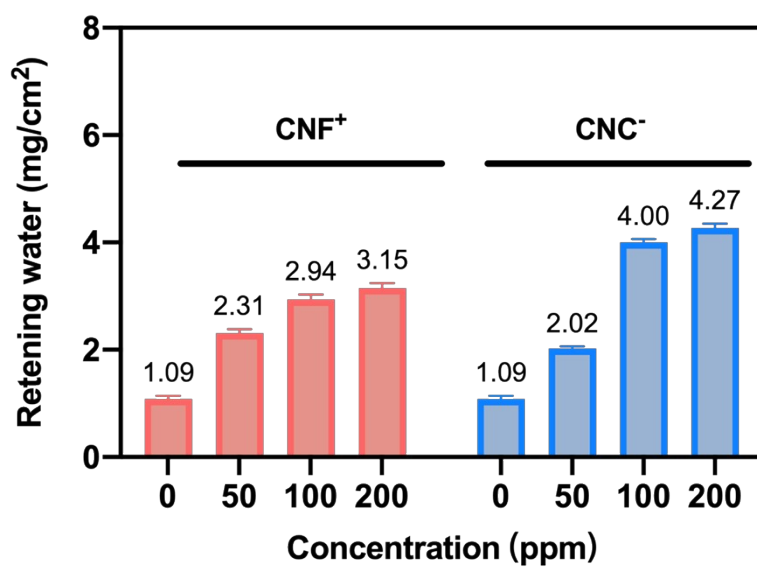



**Figure S8.** Water retention of CNF<sup>+</sup> and CNC<sup>-</sup> suspensions on cotton leaves from the range of 0-200 mg/L.

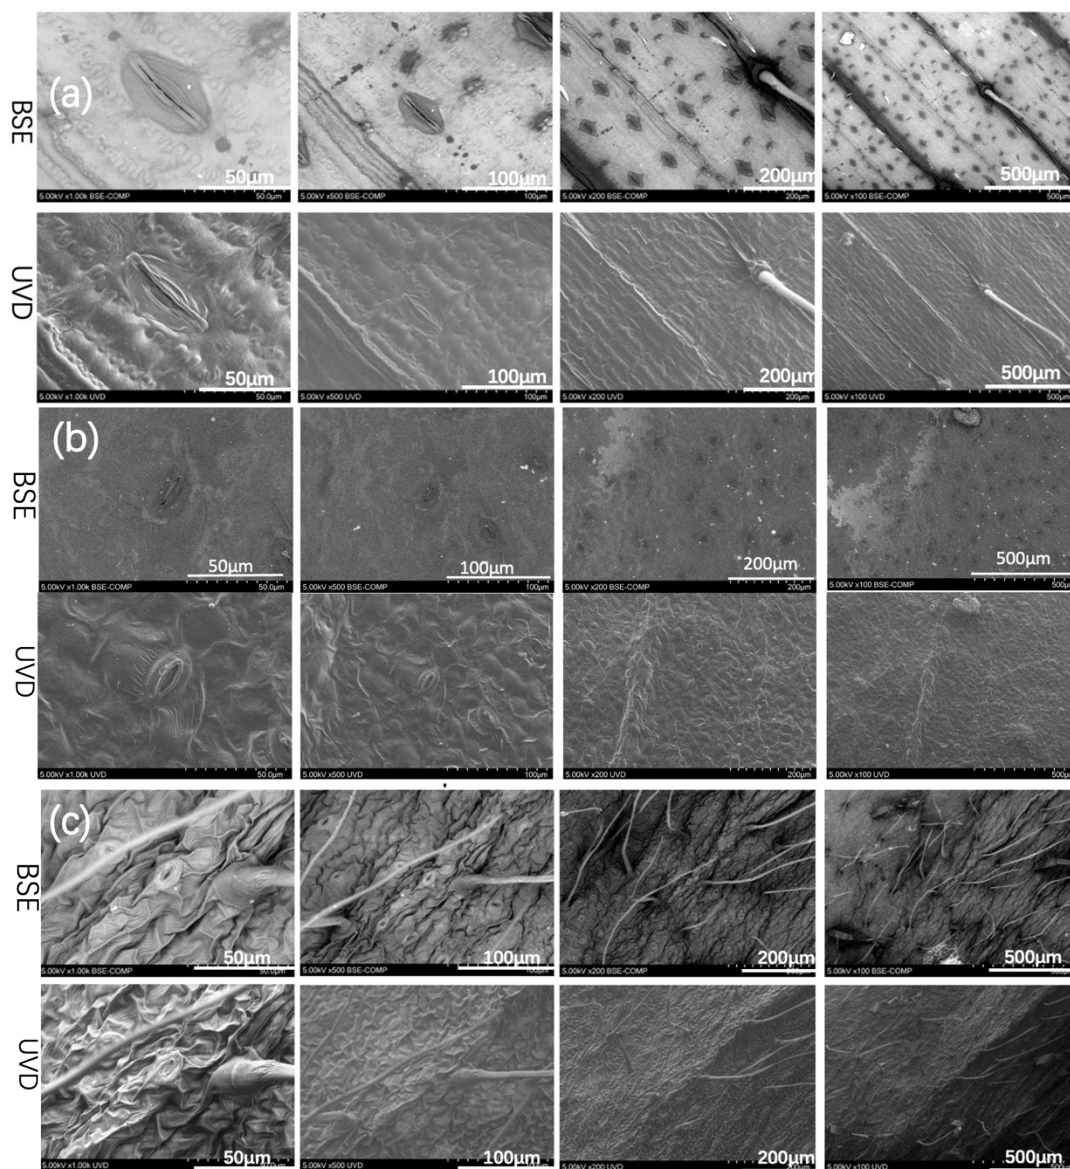

**Figure S9.** The SEM images of the adaxial surfaces of various leaves. (a) Sweet corn; (b) Cotton; (c) Chickpea.

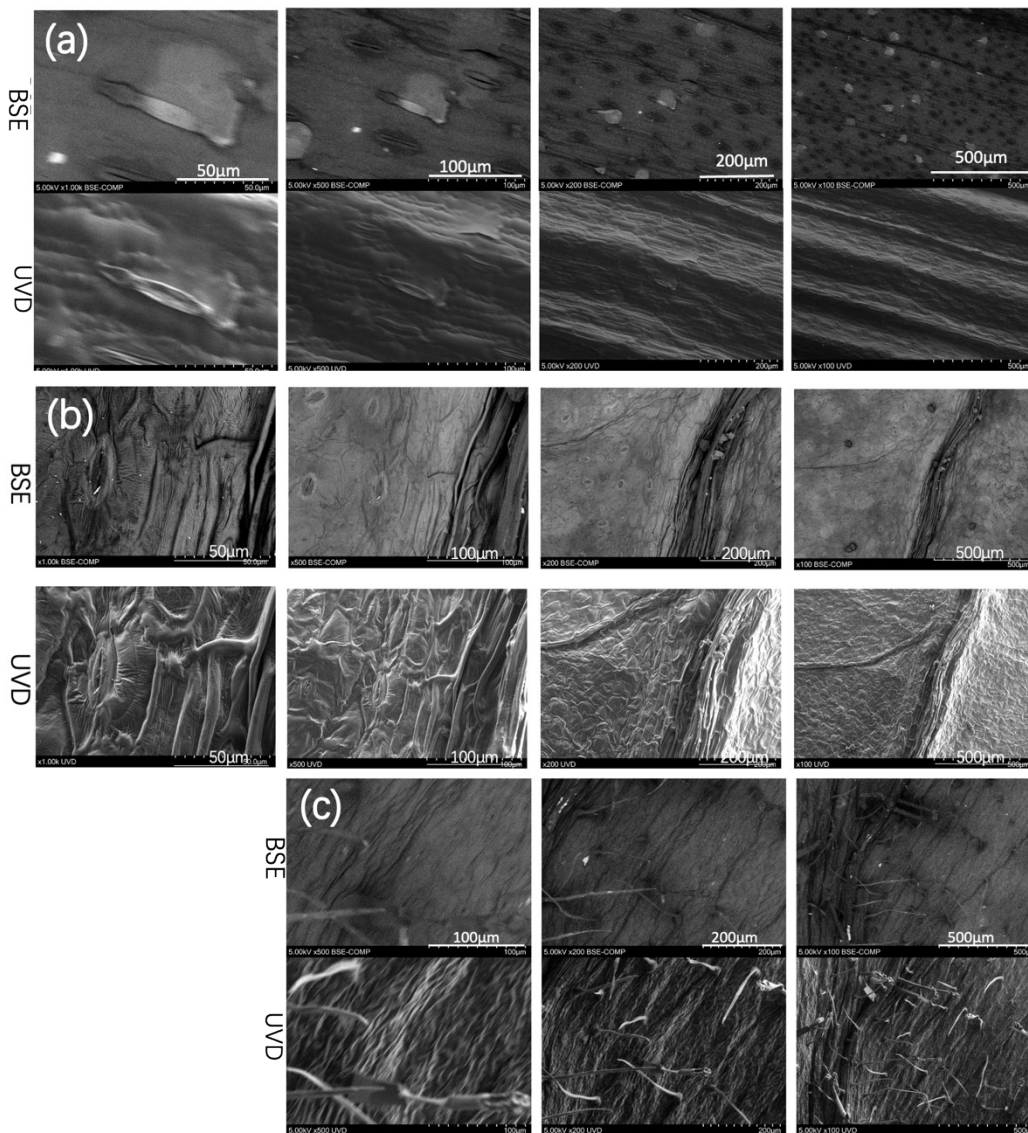

**Figure S10.** The SEM images of the abaxial

surfaces of various leaves. (a) Sweet corn; (b) Cotton; (c) Chickpea.

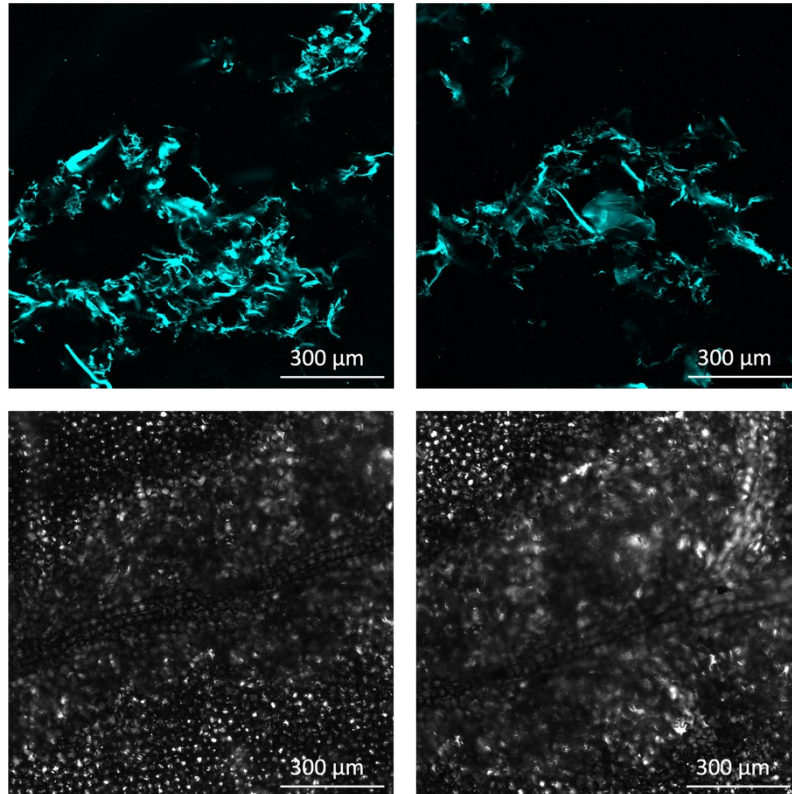

**Figure S11.** Confocal microscope images of cotton leaves after dipping in 100 mg/L of CMF<sup>+</sup> stained with CFW.

**Table S1.** Pore information of nanocellulose dry matrix obtained by TEM and AFM.

| Cellulose        | 0-1 $\mu\text{m}^2$ |            | 1 – 10 $\mu\text{m}^2$ |            |
|------------------|---------------------|------------|------------------------|------------|
|                  | Pore area           | Density    | Pore area              | Density    |
|                  | ( $\mu\text{m}^2$ ) | (pre area) | ( $\mu\text{m}^2$ )    | (pre area) |
| CNF <sup>+</sup> | 0.21 ± 0.08         | 0.12       | 2.54 ± 0.34            | 0.03       |
| CMF <sup>+</sup> | --                  | --         | --                     | --         |
| CNC <sup>-</sup> | --                  | 0.11       | --                     | --         |

**Table S2.** Increase percent of LHC compared to the milli-Q water (%). D and S represent the dipping and spraying methods, respectively.

|                  | Cotton |      | Chickpea |      | Sweet corn |      |
|------------------|--------|------|----------|------|------------|------|
|                  | D      | S    | D        | S    | D          | S    |
| CNF <sup>+</sup> | 170.0  | 153  | 60.2     | 58.2 | 41.7       | 42.2 |
| CMF <sup>+</sup> | 89.8   | 83.8 | 42.9     | 40.2 | 15.0       | 14.1 |
| CNC <sup>-</sup> | 267    | 256  | 40.9     | 37.7 | 26.2       | 25.5 |

**Table S3.** Characterization of microstructure of various leaves

| Leaves type |         | Stomatal area<br>( $\mu\text{m}^2$ ) | Density of Stomata |                              |
|-------------|---------|--------------------------------------|--------------------|------------------------------|
|             |         |                                      | area (%)           | number (per/ $\text{mm}^2$ ) |
| Cotton      | adaxial | 66                                   | 0.22               | 33                           |
|             | abaxial | 100                                  | 0.61               | 65                           |
| Sweet corn  | adaxial | 120                                  | 0.78               | 55                           |
|             | abaxial | 330                                  | 2.99               | 71                           |
| Chickpea    | adaxial | 50                                   | 0.88               | 170                          |
|             | abaxial | N/A                                  | N/A                | N/A                          |
